# Supplementary material
Source: MDPI journal article supplement (https://www.mdpi.com/2297-8739/7/3/39)
Supplement: s1 [file s1]

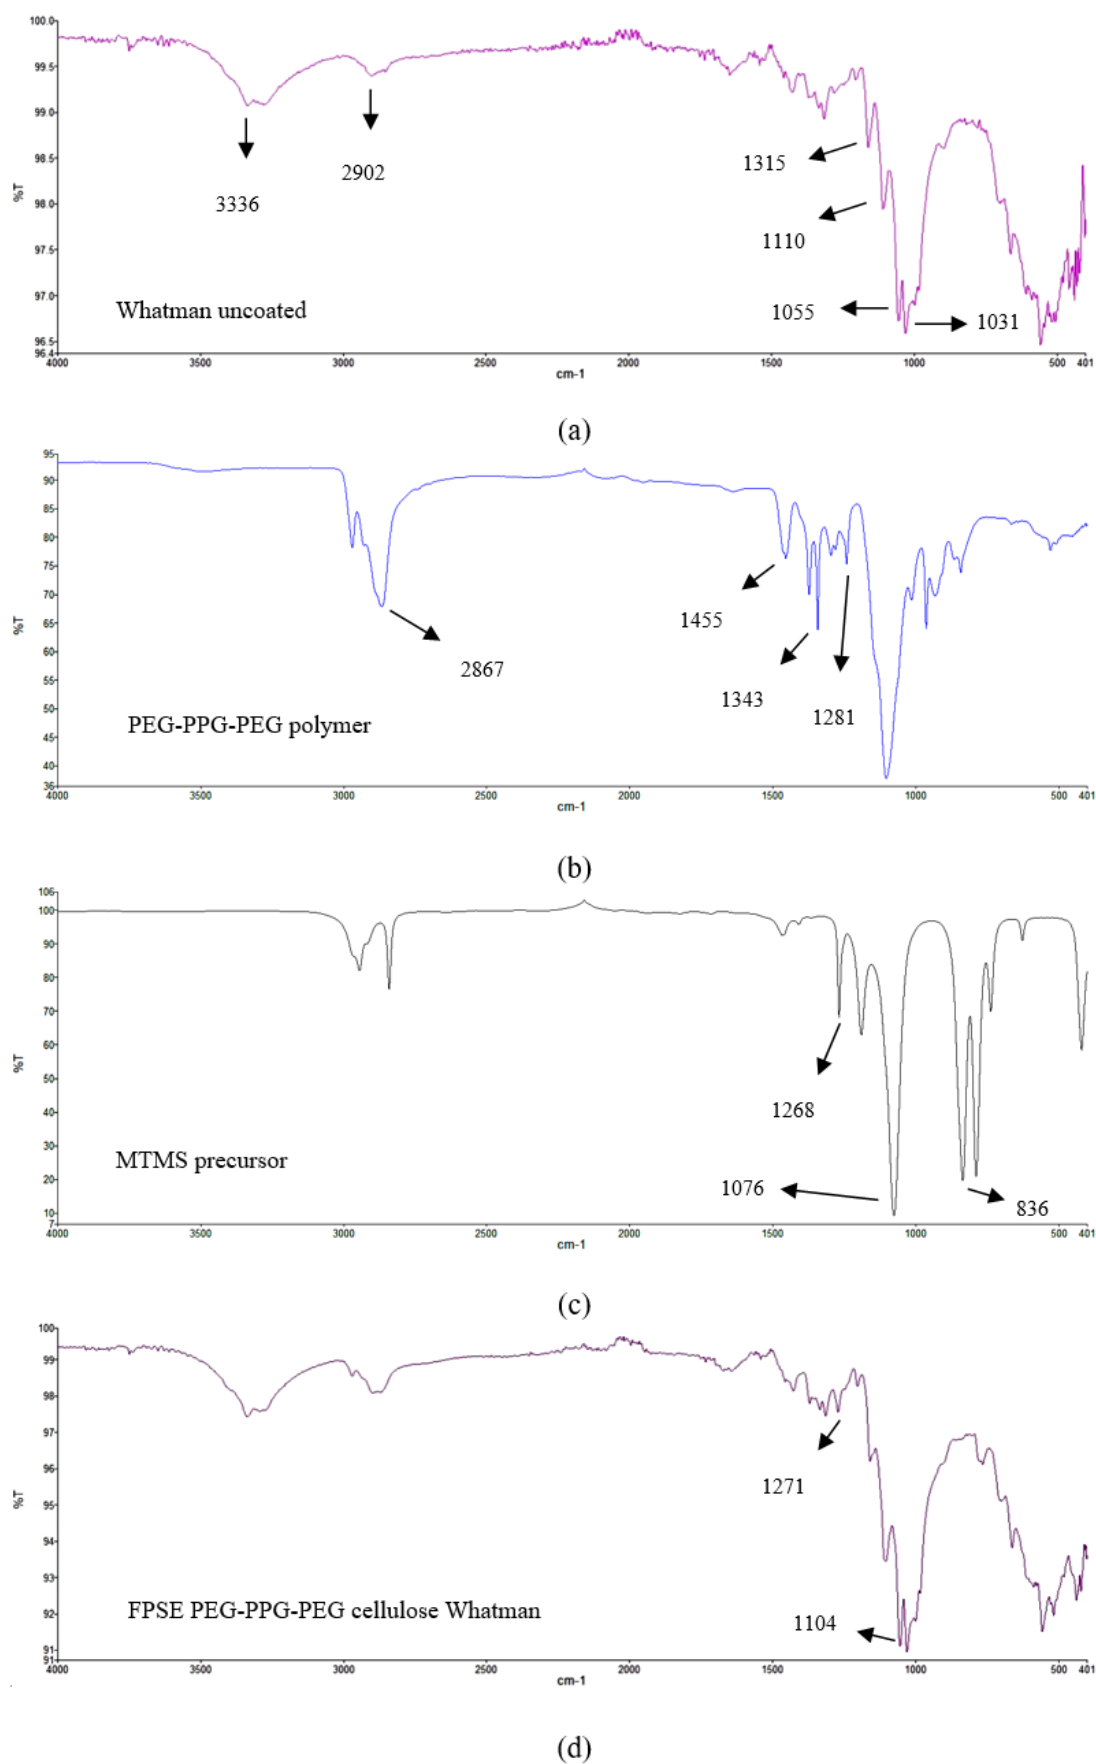

**Figure S1.** FT-IR spectra of different components in (a) Whatman uncoated material, (b) PEG-PPG-PEG polymer, (c) MTMS precursor and (d) Whatman PEG-PPG-PEG coated media.

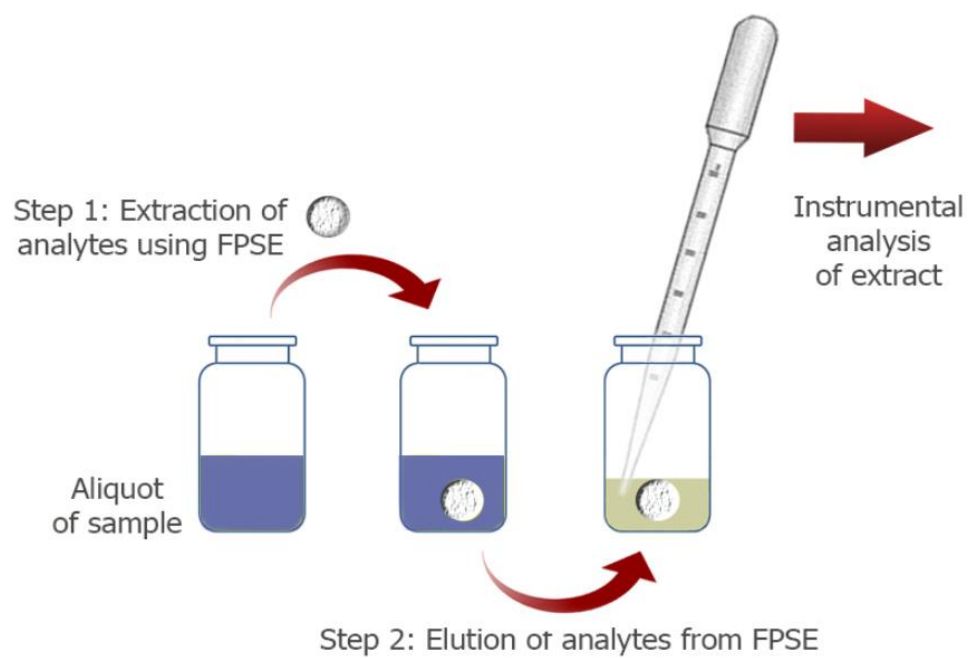

**Figure S2.** General procedure applied in FPSE extraction.
